# Supplementary material
Source: publisher figshare collection journal article supplement (https://springernature.figshare.com/ndownloader/files/14700596)
Supplement: Supplementary file [file 14700596]

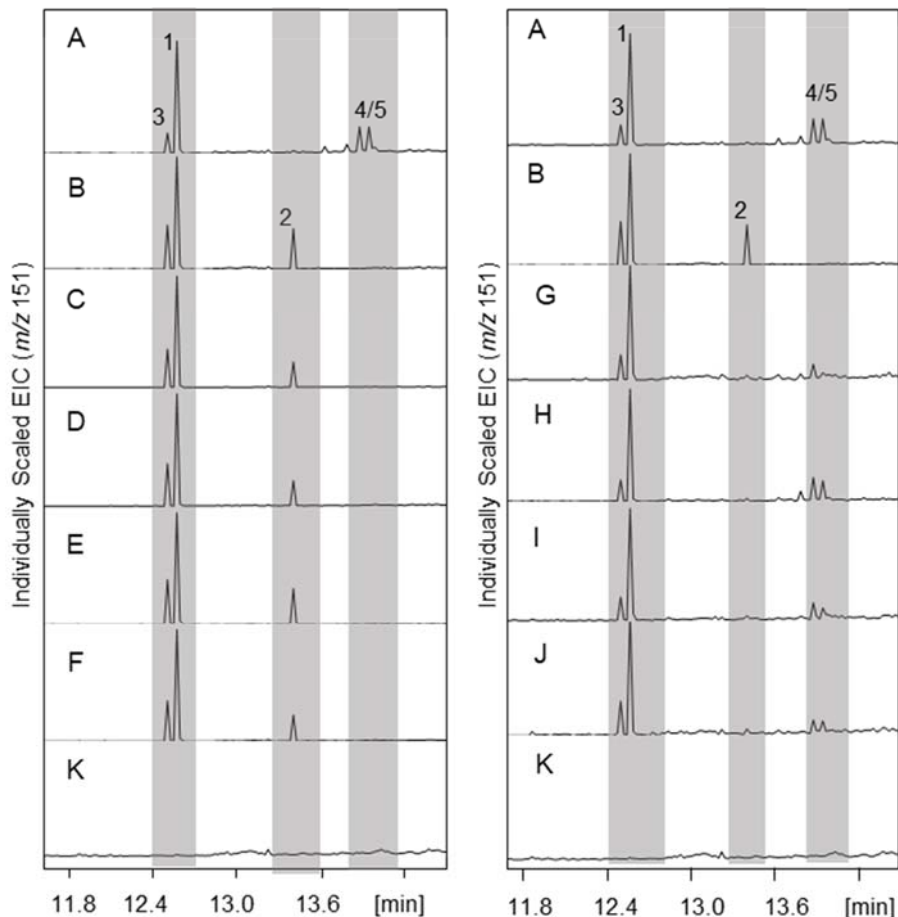

**Additional file 4: Figure S2.** GC-MS analysis of reaction products derived from *Nicotiana benthamiana* co-expression assays of *MvCPS1* and *MvELS* with the P450 candidates *Mv1270*, *Mv1545*, *Mv4213*, *Mv6504*, and *Mv3392*, respectively. Shown are extracted ion chromatograms ( $m/z$  151) of the diterpenoid products 9,13-epoxy labd-14-ene **1**, labda-13(16),14-dien-9-ol **2**, unidentified diterpene **3**, 9,13-epoxy labd-14-ene-18-ol **4**, and 9,13-epoxy labd-14-ene-19-ol **5**. The suppressor of RNA silencing p19 was included in all co-expression assays. **(A)** Co-expression of *MvCPS1*, *MvELS* and *MvCYP71AU87*, **(B)** Co-expression of *MvCPS1* and *MvELS*, **(C-F)** Co-expression of *MvCPS1* and *MvELS* with the P450 *Mv1545*, *Mv4213*, *Mv6504*, and *Mv3392*, respectively), **(G-J)** Co-expression of *MvCPS1* and *MvELS* with *MvCYP71AU87* and the individual P450 *Mv1545*, *Mv4213*, *Mv6504*, and *Mv3392*, respectively. **(K)** Expression of *MvCYP71AU87* only.
